# Supplementary material for: An Interpretable Clinical-Radiomics Model for Risk Stratification of Postoperative Liver Metastasis in Colorectal Cancer Patients
Source: Research Square preprint supplement (doi:10.21203/rs.3.rs-8783529/v1), 2026-02-17
Supplement: Supplementary file 1 [file 5a4ad641bf69d01aca412417.docx]

**Supplementary materials**

**Table1 Clinical predictive model performance**

| Model | Group | AUC | SEN | SPC | ACC |
| --- | --- | --- | --- | --- | --- |
| Logistic  Regression | Train | 0.8224 | 0.8514 | 0.7018 | 0.7606 |
| Test | 0.8099 | 0.7143 | 0.7174 | 0.716 |
| Random  Forest | Train | 0.8375 | 0.8514 | 0.7018 | 0.7606 |
| Test | 0.7966 | 0.6857 | 0.7174 | 0.7037 |
| SGD | Train | 0.5 | 1 | 0 | 0.3936 |
| Test | 0.5 | 1 | 0 | 0.4321 |
| SVM | Train | 0.8061 | 0.8514 | 0.7018 | 0.7606 |
| Test | 0.7988 | 0.6857 | 0.7391 | 0.716 |
| XGBoost | Train | 0.8123 | 0.8919 | 0.6579 | 0.75 |
| Test | 0.7963 | 0.7429 | 0.6739 | 0.7037 |

**Table2 Radiomics predictive model performance**

| Model | Group | AUC | SEN | SPC | ACC |
| --- | --- | --- | --- | --- | --- |
| Logistic  Regression | Train | 0.8087 | 0.8919 | 0.6491 | 0.7447 |
| Test | 0.7913 | 0.9143 | 0.6304 | 0.7531 |
| Random  Forest | Train | 0.9197 | 0.9459 | 0.7544 | 0.8298 |
| Test | 0.8193 | 0.8286 | 0.6957 | 0.7531 |
| SGD | Train | 0.8046 | 0.8784 | 0.6491 | 0.7394 |
| Test | 0.7944 | 0.8857 | 0.6522 | 0.7531 |
| SVM | Train | 0.8062 | 0.8919 | 0.6491 | 0.7447 |
| Test | 0.7901 | 0.9143 | 0.6304 | 0.7531 |
